# Supplementary material for: Purification and Characterization of a Novel Antiplatelet Peptide from Deinagkistrodon acutus Venom
Source: MDPI journal article supplement (doi:10.3390/toxins10080332), 2018-08-16
Supplement: s1 [file s1]

# Supplementary Material: Purification and Characterization of a Novel Antiplatelet Peptide from *Deinagkistrodon acutus* Venom

Yi Kong, Qing Sun, Qi Zhao and Yaqiong Zhang

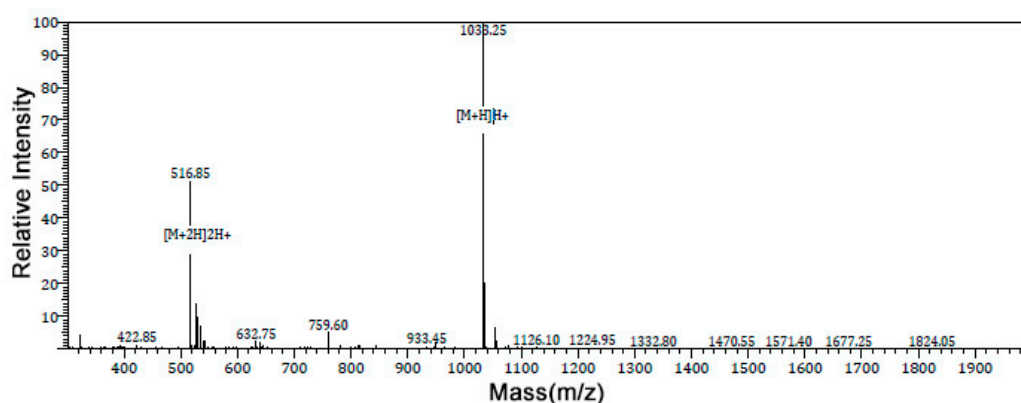

**Figure S1.** Mass spectrum of DAA-8. The molecular mass of DAA-8 was determined using ESI-MS. It was shown that the  $m/z$  value of  $[M+H]^+$  was 1033.25 Da.
